# Supplementary material
Source: Elsevier journal article supplement (https://www.sciencedirect.com/science/article/pii/S0213911119302262)
Supplement: mmc1 [file S0213911119302262:mmc1.docx]

**Anexo I. Entrevistas fenomenológicas: ejemplos**

| Entre  vista | N.º ref. | Entrevista fenomenológica: transcripción de variables de valor en lenguaje coloquial |
| --- | --- | --- |
| 1 | 1 | Reingreso y derivación a Santa Marina de los pacientes pluripatológicos con necesidades de atención sanitaria de mayor intensidad. |
| 1 | 2 | Apoyo médico por parte de la unidad de cuidados paliativos en los pacientes de nuestro centro con perfil asistencial de cuidados al final de la vida |
| 1 | 3 | Acceso a la unidad de día, sin necesidad de ingreso. |
| 1 | 4 | Suministro por parte del Hospital de Santa Marina de medicación de uso hospitalario. |
| 1 | 5 | Derivaciones hacia el Hospital de Santa Marina. |
| 1 | 6 | Especialización de servicio: unidad de cuidados paliativos, unidad de pluripatología, unidad de día. |
| 1 | 7 | Inmediatez en la respuesta. |
| 1 | 8 | Cercanía física. |
| 1 | 9 | Seguridad para los pacientes. |
| 2 | 10 | Apoyo para mandar a las personas. |
| 2 | 11 | Consultas telefónicas. |
| 2 | 12 | Referencia para la gente que ya está ingresada en residencias (sobre todo gente mayor). |
| 2 | 13 | Cuidados paliativos. |
| 2 | 14 | Apoyo a la gente que va a morir. |
| 3 | 15 | Hospital cercano, donde priman las relaciones personales. |
| 3 | 16 | Accesibilidad. |
| 4 | 17 | Segunda casa, donde ha pasado semanas enteras viviendo. |
| 4 | 18 | Como un hotel. |
| 4 | 19 | Limpieza excelente y habitaciones muy bien equipadas. |
| 4 | 20 | Cuenta con una capilla que está muy bien. |
| 4 | 21 | Parking gratuito. |
| 4 | 22 | Le mandaron a casa un paquete con sondas mucho más largas para facilitar la movilidad y la estancia en la cama de casa. |
| 4 | 23 | Rapidez de atención. |
| 4 | 24 | Facilidades para los familiares acompañantes. |
| 5 | 25 | Los trabajadores conocen a todos los pacientes. |
| 5 | 26 | Compañerismo entre los trabajadores. |
| 5 | 27 | Cuidados paliativos. |
| 5 | 28 | Como un hotel. |
| 6 | 29 | Liberar camas de Basurto. |
| 6 | 30 | Hospital de estancia prolongada (paliativos). |
| 7 | 31 | Ingreso directo a residentes de residencias. |
| 7 | 32 | Participación en programas conjuntos con residencias. |
| 8 | 33 | Proveedor de prácticas de la universidad. |
| 8 | 34 | Mejor trato al ser un hospital pequeño (cercanía con los pacientes). |
| 8 | 35 | Parking gratuito con sitio. |
| 8 | 36 | Exclusivos en cuidados paliativos y larga estancia. |
| 8 | 37 | Útil para personas que no pueden tener a los familiares en casa. |
| 9 | 38 | Circuitos de actuación con el ámbito social y sociosanitario de manera proactiva y preventiva. |
| 10 | 39 | La dirección siempre intenta que las relaciones sean fluidas con el personal. |
| 10 | 40 | Voluntad para resolver las cuestiones laborales. |
| 10 | 41 | Gestión basada en la transparencia. |
| 11 | 42 | Pacientes de cuidados paliativos. |
| 11 | 43 | La comunicación y coordinación es muy fácil y fluida. |
| 11 | 44 | Centro de media-larga estancia que complementa a otros centros. |
| 11 | 45 | Camas para cuidados paliativos. |
| 12 | 46 | Librar camas y espacio. |
| 12 | 47 | Muchísimo más tranquilo y los pacientes están en un estado más estable; otro ritmo que el paciente agradece mucho. |
| 12 | 48 | Mucho apoyo y cuidado en la muerte. |

**Anexo II. Trazabilidad de la respuesta hacia las variables de valor orientadas a indicadores**

| **Trazabilidad de las variables de valor identificadas en las entrevistas fenomenológicas en relación con las variables de valor orientadas a indicadores** | **Variables de valor orientadas a indicadores** | |
| --- | --- | --- |
| **Variables** | **Indicadores** |
| 6, 36, 44 | Hospitalización | N.º de estancias de larga duración |
| 2, 6, 13, 27, 30, 36, 42, 45 | Hospitalización | N.º de estancias de cuidados paliativos |
| 7, 8, 15, 16, 23 , 11 | Atención urgencias | Urgencias atendidas |
| 1, 5, 10, 29, 46, 3, 6, 31 | Liberar camas de otros hospitales | Pacientes procedentes de otros hospitales |
| 33 | Prácticas reales para alumnos | N.º de horas de curso académico alumnos en prácticas |
| 21,35 | Parking gratuito | N.º visitantes año/estancia media |
| 37 | Liberación de cuidador | Estancias de pacientes no residenciados (30%) |
| 32, 7, 8, 15, 16, 23 | Apoyo a residencias | Estancias de pacientes cuyo origen es una residencia |
|  | Ahorro de emisiones | Reducción de CO2 |
| 4, 22, 38 | No incorporadas |  |
| 9,12, 47, 14, 48, 15, 25, 34, 17, 18, 24, 28, 19, 20, 26, 43, 40, 39, 43, 41 | Emocional |  |

**Tabla 1**

Comparación entre coste-beneficio SROI y contabilidad social.

|  | Análisis coste-beneficio/SROI | Contabilidad social |
| --- | --- | --- |
| Objetivo | Evaluar si merece la pena la inversión realizada en una intervención  El objetivo principal es el análisis de eficiencia interna | Calcular el valor social que genera o detrae una organización durante un periodo temporal (ejercicio)  El objetivo principal es permitir análisis de eficiencia relativos a otras organizaciones |
| Costes | Valor monetario | Valor monetario  (solo son relevantes en el caso de la financiación pública) |
| Beneficios | Considera todo tipo de impactos (salud y no salud) en el marco de la triple *botton line* (social, económicos y medioambientales)  Complementariamente identifica los potenciales efectos negativos de la intervención  Reporta como valor monetario el beneficio social  Utiliza *proxis* financieros para estimar el valor de los beneficios que no son fácilmente monetizables | Considera impactos más amplios que los relacionados con la salud, incorpora la totalidad del impacto socioeconómico. La incorporación del impacto medioambiental, siempre negativo, requiere una metodología específica que permita trasladar el valor a la contabilidad social  Reporta como valor monetario el beneficio social  Utiliza *proxis* financieros para estimar el valor de la totalidad de los beneficios |
| Nivel de aplicación | Nivel de intervención: proyectos, programas y políticas | Nivel preferente de intervención: organizativo, estratégico y de políticas |
| Perspectiva temporal | Retrospectivo o prospectivo (fundamentalmente prospectivo) | Fundamentalmente retrospectivo, aunque los resultados pueden utilizarse para hacer inferencias prospectivas (similar a la contabilidad) |
| Descuento de valor futuro | Sí | No, ya que trabaja sobre valor pasado. |
| Dialogo con los *stakeholders* | Sí | Sí |
| Teoría del cambio | Sí | No exige la teoría del cambio, aunque puede tener cabida de forma instrumental |
| Principales *outputs* de análisis | Ratio SROI >1 | Genera una contabilidad completa, de la que puede extraerse cualquier ratio que se considere pertinente, con objeto de realizar análisis de eficiencia; p. ej., el SROI |
| Principal utilidad | Establecimiento de prioridades en la toma de decisiones de inversión | Comprensión del valor social generado y de su distribución  Mejora de la estrategia/gestión en la optimización del valor social generado o en su distribución |

**Tabla 2**

Resumen del cálculo monetario del valor social generado en 2016

| **N** | **Variables** | **Indicadores** | ***Output*** | **Valor de referencia** | ***Proxi*** | **Valor social** |
| --- | --- | --- | --- | --- | --- | --- |
| 1 | Hospitalización | N.º estancias | 43.731 | Coste medio cama hospital Osakidetza | 373,5 € | 16.336.589,67 € |
| 2 | Hospitalización | N.º estancias cuidados paliativos | 9.256 | Coste medio cama hospital Osakidetza | 262,65 € | 2.431.088,40 € |
| 3 | Atención urgencias | Urgencias atendidas | 5.975 | Coste atención medica urgencias | 98,43 € | 588.119,25 € |
| 4 | Liberar camas otros hospitales | Pacientes procedentes de otros hospitales | 26.312 |  | 44,8 € | 1.180.113,83 € |
| 5 | Prácticas reales para alumnos | N.º horas curso académico alumnos en prácticas | 4.633 |  | 18 € | 83.394,00 € |
| 6 | Parking gratuito | N.º visitantes año/estancia media | 105.974 | OTA/parking | 3,1 € | 328.519,40 € |
| 7 | Liberación cuidador | Estancias de pacientes no residenciados (30%) | 11.043 | 10 € hora y una jornada de 8 horas | 40 € | 441.720,00 € |
| 8 | Apoyo a residencias | Estancias de pacientes cuyo origen es residencias | 16.177 |  | 50€ | 808.850,00 € |
| 9 | Ahorro de emisiones |  | 23 | Fijación CO2  Derechos por hectárea | 1.300 € | 29.900,00 € |
|  |  |  | Valor social específico total (2016) | | | 22.228.294,55 € |

**Tabla 3**

Resumen de las variables de valor social

| Tipo de valor | 2017 | 2016 | 2015 | 2014 | 2013 |
| --- | --- | --- | --- | --- | --- |
| Agregado | 21.669.567 € | 21.478.63 € | 24.688.862 € | 23.809.02 € | 23.734.115 € |
| Movilizado (explotación) | 1.299.656 € | 1.298.969 € | 1.383.98 € | 992.047 € | 949.728 € |
| Movilizado (inversión) | 479.771 € | 164.282 € | 91.890 € | 64.851 € | 47.995 € |
| Social de mercado | 23.448.99 € | 22.941.889 € | 26.164.734 € | 24.865.918 € | 24.731.838 € |
| Social específico | 21.262.616 € | 22.228.295 € | 23.745.496 € | 24.639.000 € | 24.212.19 € |
| Social integrado | 44.711.609 € | 45.170.184 € | 49.910.229 € | 49.504.918 € | 48.944.02 € |
| Emocional | 10.163.530 € | 10.513.983 € | 11.469.074 € | 12.196.305 € | 11.573.42 € |
| Socioemocional | 54.875.140 € | 55.684.167 € | 61.379.304 € | 61.701.223 € | 60.517.455 € |

**Tabla 4**

Índices de eficiencia a partir de la contabilidad social

| **Índices de eficiencia** | **2017** | **2016** | **2015** | **2014** | **2013** |
| --- | --- | --- | --- | --- | --- |
| Ratio sobre financiación | 184,88 | 192,76 | 213,6 | 218,65 | 218,96 |
| Índice de retorno Administración pública | 0,39 | 0,39 | 0,38 | 0,37 | 0,38 |
| Valor social añadido | 0,85 | 0,93 | 1,14 | 1,19 | 1,2 |
| Índice de equilibrio (social) | 0,46 | 0,48 | 0,53 | 0,54 | 0,54 |
